# Supplementary material
Source: Springer Nature journal article supplement (https://www.springermedizin.de/resource/supplementary/12895_2011_129_MOESM3_ESM.pdf/9514200)

## Distribution of skin disorders in the Mbam area (N=248)

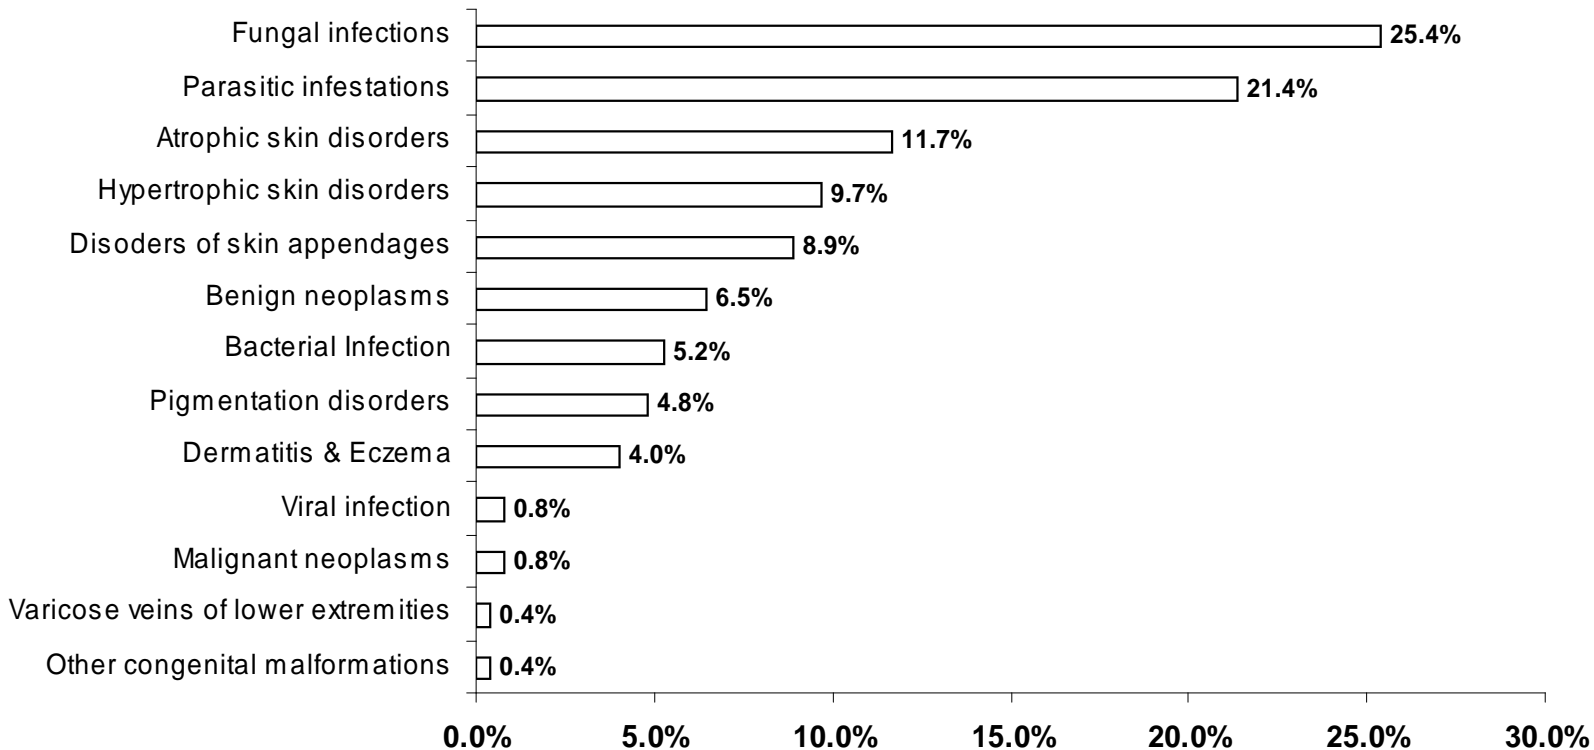

Supplement: MOESM3 [file 9514200]
